# Supplementary material for: FAK inhibition radiosensitizes pancreatic ductal adenocarcinoma cells in vitro
Source: PubMed Central journal article supplement (PMC7801360; doi:10.1007/s00066-020-01666-0), 2020-07-23
Supplement: 66_2020_1666_MOESM2_ESM.pdf [file 66_2020_1666_MOESM2_ESM.pdf]

(a)

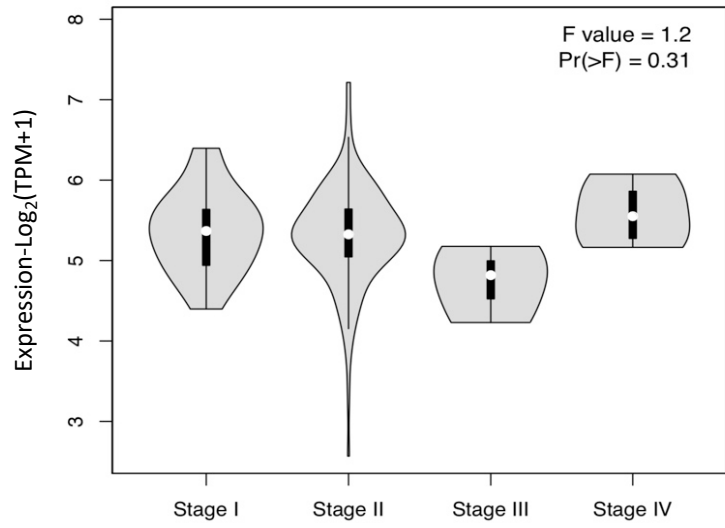

(c)

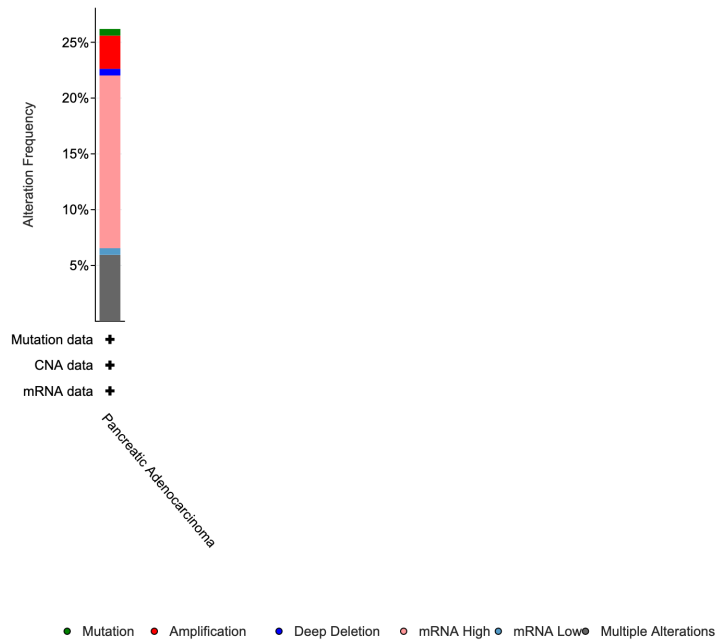

(b)

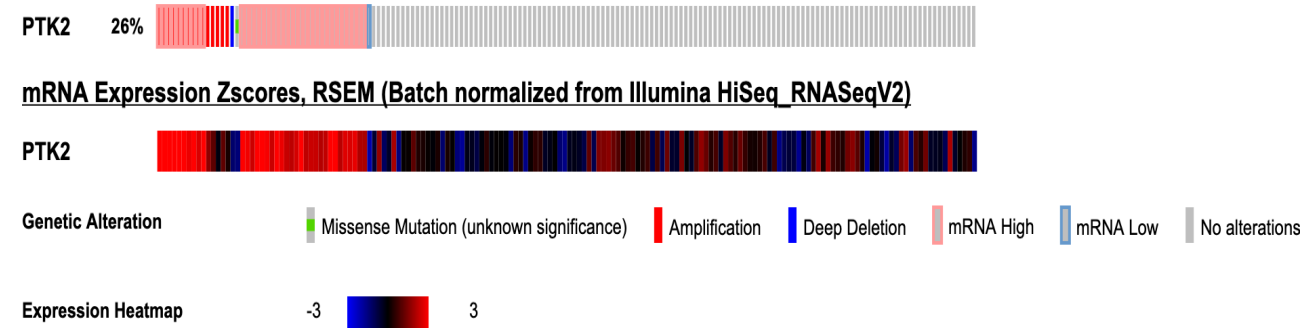

(d)

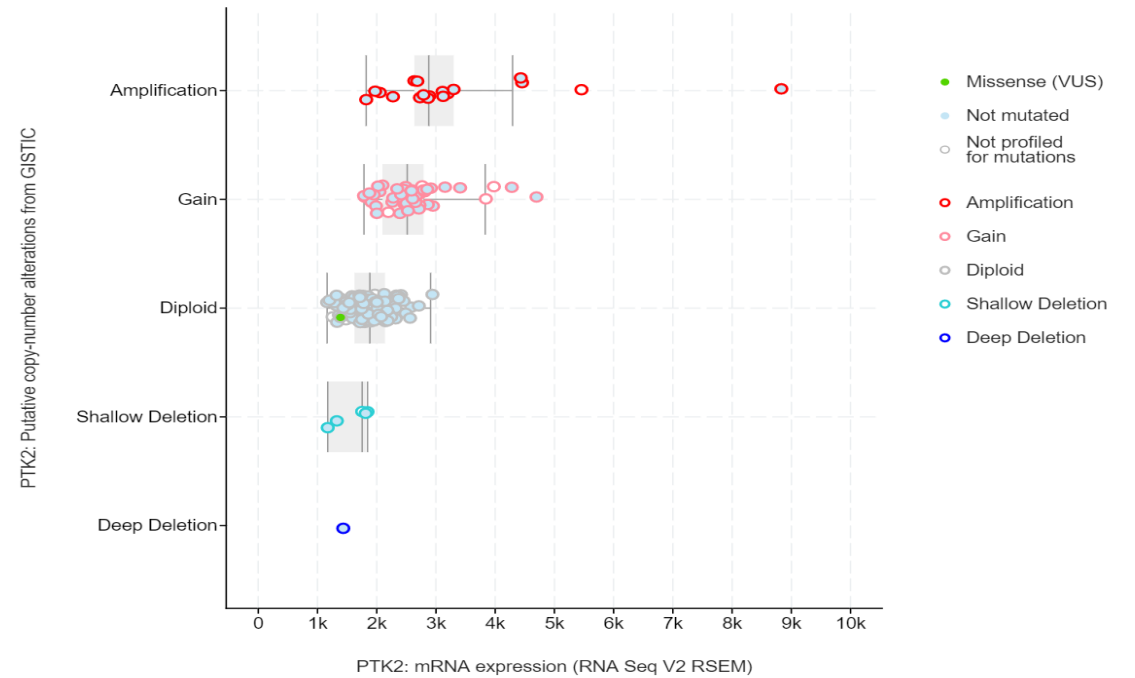

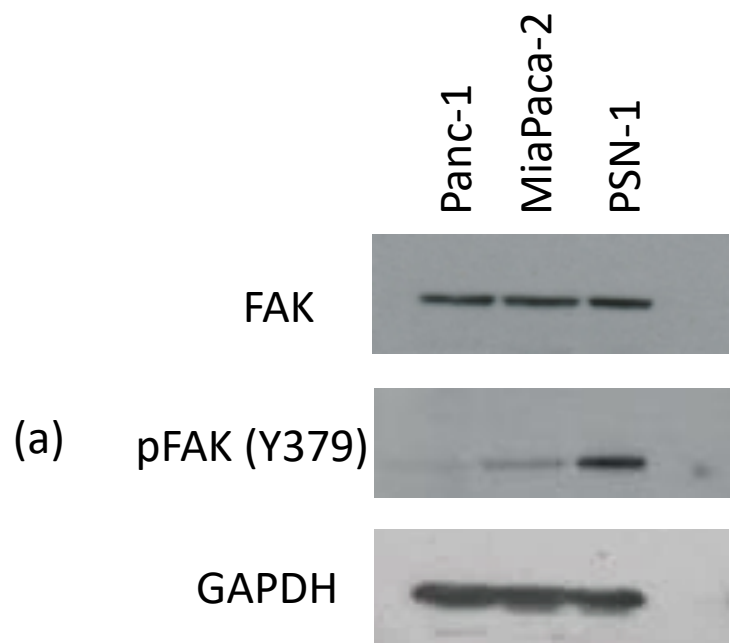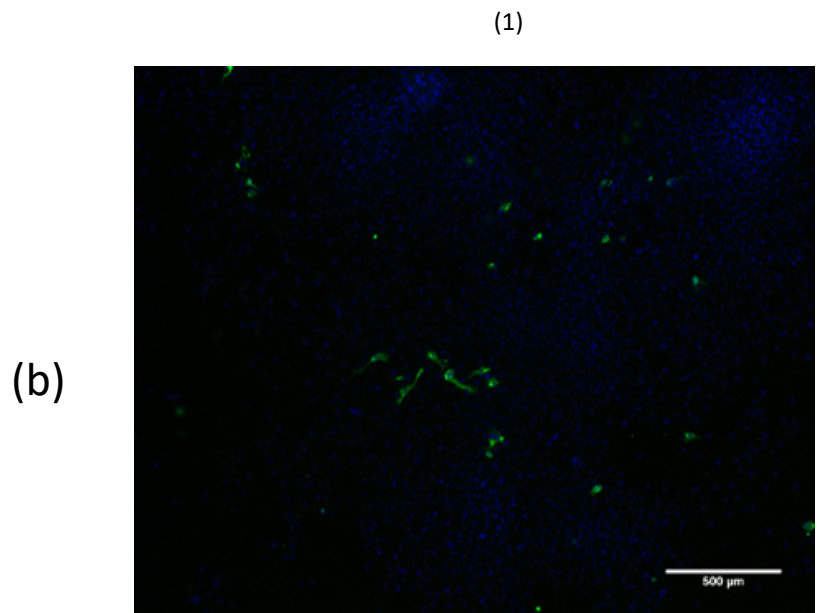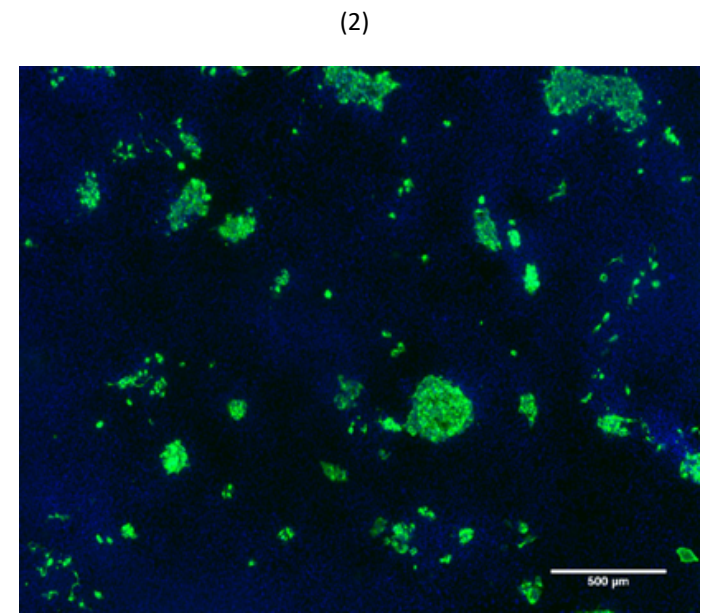

(a)

Survival fraction in Panc-1 cells at 6 Gy as monoculture

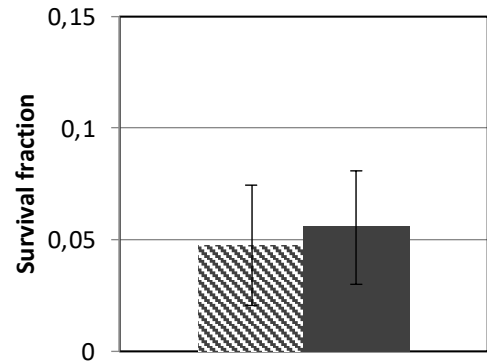

(b)

Survival fraction in Panc-1 cell line at 6 Gy in co-culture with LTC-14

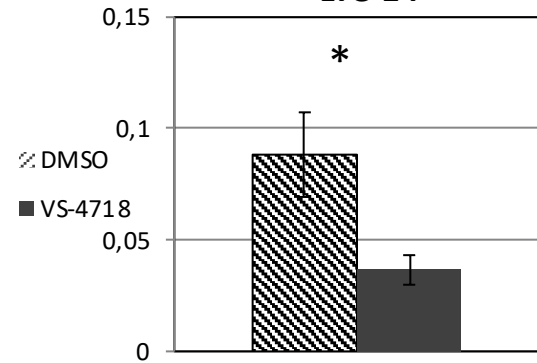

(c)

Survival fraction in Panc-1 cell line at 6 Gy in co-culture with h.PSCs

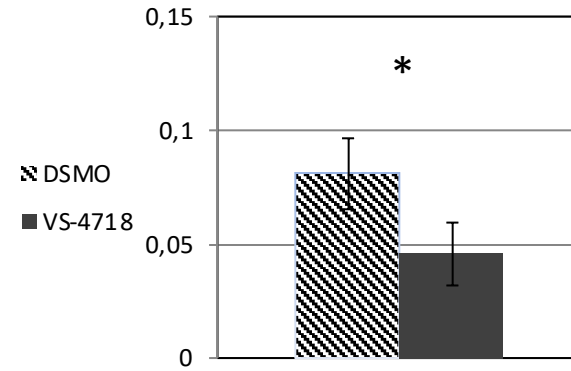

(d)

Survival fraction in Panc-1 cell line on collagen-I

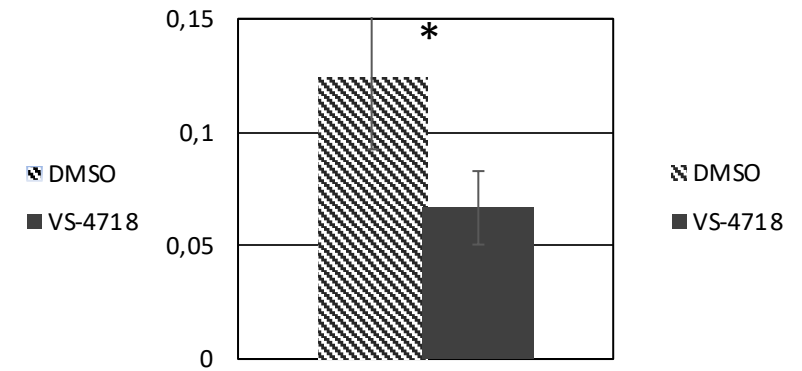

(d)

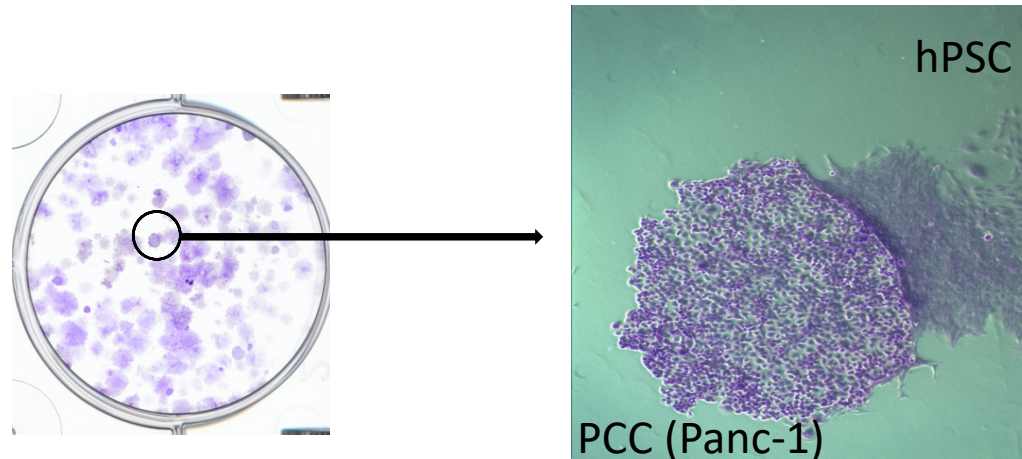

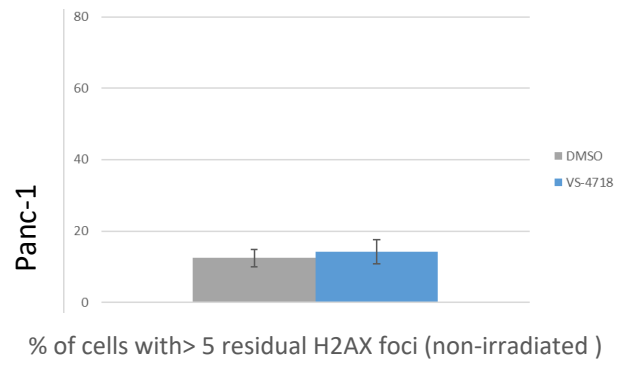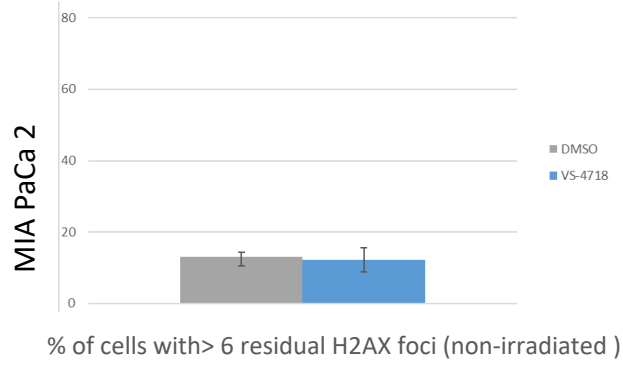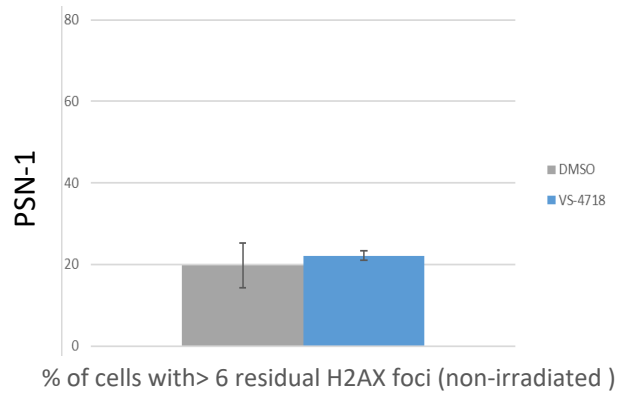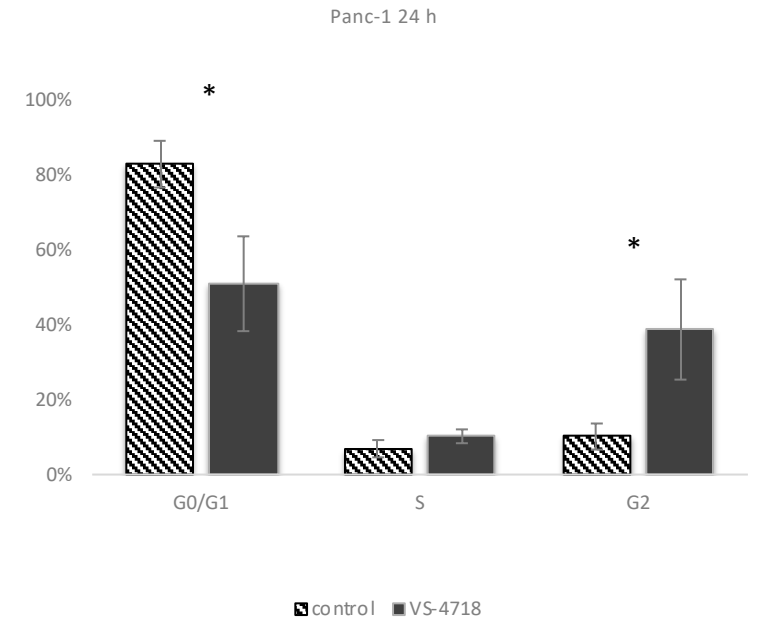

(a)

(b)
